# Supplementary material for: Drug Resistance Reversal Potential of Nanoparticles/Nanocomposites via Antibiotic’s Potentiation in Multi Drug Resistant P. aeruginosa
Source: MDPI journal article supplement (doi:10.3390/nano12010117), 2021-12-30
Supplement: s1 [file s1]

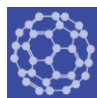

Supplementary Materials

# Drug Resistance Reversal Potential of Nanoparticles/Nanocomposites via Antibiotic's Potentiation in Multi Drug Resistant *P. aeruginosa*

Pratima Pandey <sup>1,2,†</sup>, Rajashree Sahoo <sup>3,†</sup>, Khusbu Singh <sup>3</sup>, Sanghamitra Pati <sup>3</sup>, Jose Mathew <sup>1</sup>, Avinash Chandra Pandey <sup>2</sup>, Rajni Kant <sup>4</sup>, Ihn Han <sup>5</sup>, Eun-Ha Choi <sup>5,\*</sup>, Gaurav Raj Dwivedi <sup>4,\*</sup> and Dharmendra K. Yadav <sup>6,\*</sup>

<sup>1</sup> Department of Biotechnology, Bundelkhand University, Jhansi 284128, India; bajpai.pratima@rediffmail.com (P.P.); jose\_feb\_25@yahoo.co.in (J.M.);

<sup>2</sup> Nanotechnology Application Centre, University of Allahabad, Allahabad 211002, India; ac-pandey@iuac.res.in

<sup>3</sup> Microbiology Department, ICMR-Regional Medical Research Centre, Bhubaneswar 751023, India; rajashree.rainy777@gmail.com (R.S.); singh.khusbu253@gmail.com (K.S.); drsanghamitra12@gmail.com (S.P.);

<sup>4</sup> Microbiology Department, ICMR-Regional Medical Research Centre, Gorakhpur 273013, India; rajni-kant.srivastava@gmail.com

<sup>5</sup> Plasma Bioscience Research Center, Applied Plasma Medicine Center, Department of Electrical & Bio-logical Physics, Kwangwoon University, Seoul 01897, Korea; hanihn@kw.ac.kr

<sup>6</sup> College of Pharmacy, Gachon University, Hambakmoeiro 191, Yeonsu-gu, Incheon City 406-799, Korea

\* Correspondence: choipdp@gmail.com (E.-H.C.); grdnikhil@gmail.com (G.R.D.); dharmendra30oct@gmail.com (D.K.Y.); Tel.: +82-32-820-4948

† These authors contributed equally to this work

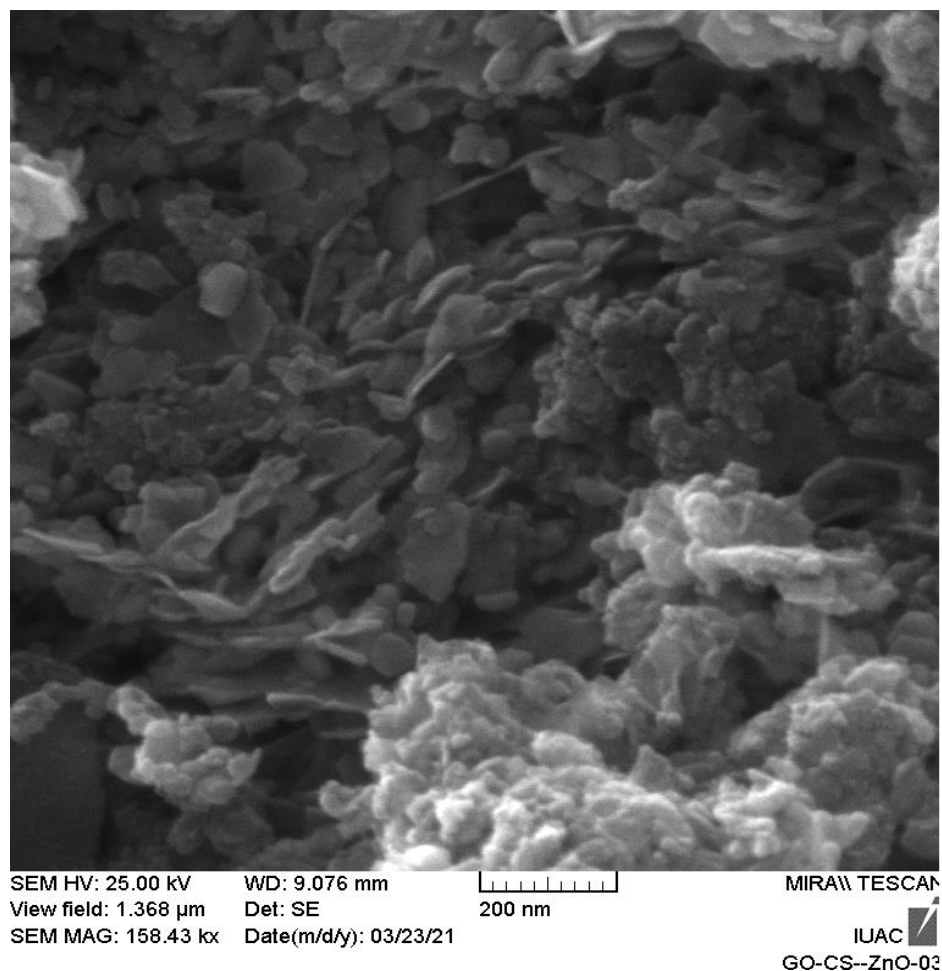

**Figure S1.** SEM image of GO@CS/ZnO.

**Table S1.** MIC of different antibiotics against PS-2, PS-3 and PS-11.

| SL. No. | Antibiotics      | MIC of antibiotics (mg/L) against clinical isolates of <i>P. aeruginosa</i> |      |       |
|---------|------------------|-----------------------------------------------------------------------------|------|-------|
|         |                  | PS-2                                                                        | PS-3 | PS-11 |
| 1.      | Ampicillin       | 1600                                                                        | 800  | 800   |
| 2.      | Cloramphenicol   | 1600                                                                        | 1600 | 400   |
| 3.      | Rifampicin       | 800                                                                         | 800  | 800   |
| 4.      | Gentamicin       | 1600                                                                        | 1600 | 1600  |
| 5.      | Ceftazidime      | 1600                                                                        | 1600 | 1600  |
| 6.      | Ciprofloxacin    | 800                                                                         | 400  | 400   |
| 7.      | Tetracycline     | 800                                                                         | 400  | 400   |
| 8.      | Sulfamethoxazole | 1600                                                                        | 1600 | 1600  |
